# Supplementary material for: Studying the Role of Visuospatial Attention in the Multi-Attribute Task Battery II
Source: MDPI journal article supplement (doi:10.3390/app14083158), 2024-04-09
Supplement: s1 [file s1]

## Supplement

Supplement starts here

**Table 1.** T-Test of all pupil diameter and cognitive load changes during the Multi-Attribute Task Battery (MATB-II) between low- and high-workload groups, as well as between low- and high-performer groups, the latter also split for within the low-workload group and the high-workload group.

| Groupings by Workload Groups           | Measurements   | Variable         | N  | Mean   | SD    | SE    | 95%_Confidence | Interval | DoF | T-Value | p-Value |
|----------------------------------------|----------------|------------------|----|--------|-------|-------|----------------|----------|-----|---------|---------|
| Performance                            | Diameter       | Low Workload     | 25 | 36.326 | 7.137 | 1.427 | 33.380         | 39.272   | 47  | 1.144   | .259    |
|                                        |                | High Workload    | 24 | 34.079 | 6.587 | 1.345 | 31.298         | 36.861   |     |         |         |
|                                        |                | combined         | 49 | 35.226 | 6.896 | 0.985 | 33.245         | 37.206   |     |         |         |
|                                        | Cognitive Load | Low Workload     | 25 | 3.461  | 1.213 | 0.243 | 2.960          | 3.962    | 47  | 0.886   | .380    |
|                                        |                | High Workload    | 24 | 3.164  | 1.133 | 0.231 | 2.685          | 3.642    |     |         |         |
|                                        |                | combined         | 49 | 3.316  | 1.172 | 0.167 | 2.979          | 3.652    |     |         |         |
|                                        | Diameter       | Low Performance  | 24 | 36.220 | 5.792 | 1.182 | 33.774         | 38.665   | 47  | 0.988   | .328    |
|                                        |                | High Performance | 25 | 34.272 | 7.811 | 1.562 | 31.047         | 37.496   |     |         |         |
|                                        |                | combined         | 49 | 35.226 | 6.896 | 0.985 | 33.245         | 37.206   |     |         |         |
|                                        | Cognitive Load | Low Performance  | 24 | 3.388  | 1.097 | 0.224 | 2.924          | 3.851    | 47  | 0.418   | .678    |
|                                        |                | High Performance | 25 | 3.246  | 1.259 | 0.252 | 2.727          | 3.766    |     |         |         |
|                                        |                | combined         | 49 | 3.316  | 1.172 | 0.167 | 2.979          | 3.652    |     |         |         |
| Performance within Low-Workload group  | Diameter       | Low Performance  | 12 | 36.845 | 5.727 | 1.653 | 33.206         | 40.484   | 23  | 0.343   | .735    |
|                                        |                | High Performance | 13 | 35.847 | 8.444 | 2.342 | 30.745         | 40.950   |     |         |         |
|                                        |                | combined         | 25 | 36.326 | 7.137 | 1.427 | 33.380         | 39.272   |     |         |         |
|                                        | Cognitive Load | Low Performance  | 12 | 3.551  | 1.253 | 0.362 | 2.754          | 4.347    | 23  | 0.347   | .732    |
|                                        |                | High Performance | 13 | 3.379  | 1.221 | 0.339 | 2.641          | 4.116    |     |         |         |
|                                        |                | combined         | 25 | 3.461  | 1.213 | 0.243 | 2.960          | 3.962    |     |         |         |
| Performance within High-Workload group | Diameter       | Low Performance  | 12 | 34.718 | 5.487 | 1.584 | 31.232         | 38.204   | 22  | 0.467   | .645    |
|                                        |                | High Performance | 12 | 33.441 | 7.729 | 2.231 | 28.530         | 38.352   |     |         |         |
|                                        |                | combined         | 24 | 34.079 | 6.587 | 1.345 | 31.298         | 36.861   |     |         |         |
|                                        | Cognitive Load | Low Performance  | 12 | 2.949  | 0.851 | 0.246 | 2.408          | 3.489    | 22  | -0.926  | .364    |
|                                        |                | High Performance | 12 | 3.379  | 1.364 | 0.394 | 2.512          | 4.245    |     |         |         |
|                                        |                | combined         | 24 | 3.164  | 1.133 | 0.231 | 2.685          | 3.642    |     |         |         |

DoF = Degrees of Freedom

**Table 2.** T-Test of all Multi-Attribute Task Battery (MATB-II) subtasks z-scores, between participants in the low-workload group and the high-workload group, as well as between participants in the low-performance group and participants in the high-performance group.

| Task                            | Group       | Variable             | N  | Mean   | SD    | SE    | 95%_Confidence | Interval | DoF | T-Value | p-Value |
|---------------------------------|-------------|----------------------|----|--------|-------|-------|----------------|----------|-----|---------|---------|
| Communication Task Score        | Workload    | Low Workload         | 25 | -0.092 | 1.281 | 0.256 | -0.621         | 0.437    | 47  | -0.655  | .516    |
|                                 |             | High Workload        | 24 | 0.096  | 0.597 | 0.122 | -0.156         | 0.348    |     |         |         |
|                                 |             | Combined Workload    | 49 | 0.000  | 1.000 | 0.143 | -0.287         | 0.287    |     |         |         |
|                                 | Performance | Low Performance      | 24 | -0.435 | 1.225 | 0.250 | -0.952         | 0.083    | 47  | -3.267  | .002    |
|                                 |             | High Performance     | 25 | 0.417  | 0.438 | 0.088 | 0.237          | 0.598    |     |         |         |
|                                 |             | Combined Performance | 49 | 0.000  | 1.000 | 0.143 | -0.287         | 0.287    |     |         |         |
| Communication Reaction-times    | Workload    | Low Workload         | 25 | 0.122  | 1.080 | 0.216 | -0.324         | 0.568    | 47  | 0.868   | .390    |
|                                 |             | High Workload        | 24 | -0.127 | 0.915 | 0.187 | -0.513         | 0.260    |     |         |         |
|                                 |             | Combined Workload    | 49 | 0.000  | 1.000 | 0.143 | -0.287         | 0.287    |     |         |         |
|                                 | Performance | Low Performance      | 24 | 0.319  | 1.051 | 0.215 | -0.125         | 0.762    | 47  | 2.279   | .027    |
|                                 |             | High Performance     | 25 | -0.306 | 0.862 | 0.172 | -0.662         | 0.050    |     |         |         |
|                                 |             | Combined Performance | 49 | 0.000  | 1.000 | 0.143 | -0.287         | 0.287    |     |         |         |
| Resource Management Score       | Workload    | Low Workload         | 25 | 0.047  | 1.163 | 0.233 | -0.433         | 0.527    | 47  | 0.331   | .742    |
|                                 |             | High Workload        | 24 | -0.049 | 0.819 | 0.167 | -0.394         | 0.297    |     |         |         |
|                                 |             | Combined Workload    | 49 | 0.000  | 1.000 | 0.143 | -0.287         | 0.287    |     |         |         |
|                                 | Performance | Low Performance      | 24 | 0.328  | 1.356 | 0.277 | -0.245         | 0.901    | 47  | 2.354   | .023    |
|                                 |             | High Performance     | 25 | -0.315 | 0.162 | 0.032 | -0.382         | -0.248   |     |         |         |
|                                 |             | Combined Performance | 49 | 0.000  | 1.000 | 0.143 | -0.287         | 0.287    |     |         |         |
| System Monitoring Score         | Workload    | Low Workload         | 25 | -0.370 | 1.092 | 0.218 | -0.821         | 0.081    | 47  | -2.831  | .007    |
|                                 |             | High Workload        | 24 | 0.386  | 0.733 | 0.150 | 0.076          | 0.695    |     |         |         |
|                                 |             | Combined Workload    | 49 | 0.000  | 1.000 | 0.143 | -0.287         | 0.287    |     |         |         |
|                                 | Performance | Low Performance      | 24 | -0.584 | 1.002 | 0.205 | -1.007         | -0.161   | 47  | -4.861  | >.001   |
|                                 |             | High Performance     | 25 | 0.561  | 0.607 | 0.121 | 0.310          | 0.812    |     |         |         |
|                                 |             | Combined Performance | 49 | 0.000  | 1.000 | 0.143 | -0.287         | 0.287    |     |         |         |
| System Monitoring Reaction-time | Workload    | Low Workload         | 25 | -0.037 | 1.056 | 0.211 | -0.473         | 0.399    | 47  | -0.265  | .792    |
|                                 |             | High Workload        | 24 | 0.039  | 0.959 | 0.196 | -0.366         | 0.444    |     |         |         |
|                                 |             | Combined Workload    | 49 | 0.000  | 1.000 | 0.143 | -0.287         | 0.287    |     |         |         |
|                                 | Performance | Low Performance      | 24 | 0.554  | 0.859 | 0.175 | 0.191          | 0.917    | 47  | 4.496   | >.001   |
|                                 |             | High Performance     | 25 | -0.532 | 0.832 | 0.166 | -0.875         | -0.189   |     |         |         |
|                                 |             | Combined Performance | 49 | 0.000  | 1.000 | 0.143 | -0.287         | 0.287    |     |         |         |
| Tracking Score                  | Workload    | Low Workload         | 25 | 0.278  | 1.119 | 0.224 | -0.184         | 0.740    | 47  | 2.051   | .046    |
|                                 |             | High Workload        | 24 | -0.289 | 0.781 | 0.159 | -0.619         | 0.040    |     |         |         |
|                                 |             | Combined Workload    | 49 | 0.000  | 1.000 | 0.143 | -0.287         | 0.287    |     |         |         |
|                                 | Performance | Low Performance      | 24 | 0.696  | 0.946 | 0.193 | 0.296          | 1.095    | 47  | 6.513   | >.001   |
|                                 |             | High Performance     | 25 | -0.668 | 0.440 | 0.088 | -0.850         | -0.486   |     |         |         |
|                                 |             | Combined Performance | 49 | 0.000  | 1.000 | 0.143 | -0.287         | 0.287    |     |         |         |

DoF = Degrees of Freedom

**Table 3.** T-Test of all Multi-Attribute Task Battery (MATB-II) subtasks z-scores, between low- and high-performing participants within either the low-workload group or the high-workload group.

| Task                             | Group         | Variable         | N  | Mean   | SD    | SE    | 95%_Confidence | Interval | DoF | T-Value | p-Value |
|----------------------------------|---------------|------------------|----|--------|-------|-------|----------------|----------|-----|---------|---------|
| Communication Task Score         | High Workload | Low Performance  | 12 | -0.100 | 0.593 | 0.171 | -0.476         | 0.277    | 22  | -1.666  | .110    |
|                                  |               | High Performance | 12 | 0.292  | 0.557 | 0.161 | -0.062         | 0.645    |     |         |         |
|                                  |               | combined         | 24 | 0.096  | 0.597 | 0.122 | -0.156         | 0.348    |     |         |         |
|                                  | Low Workload  | Low Performance  | 12 | -0.554 | 1.341 | 0.387 | -1.406         | 0.299    | 23  | -1.811  | .083    |
|                                  |               | High Performance | 13 | 0.334  | 1.106 | 0.307 | -0.334         | 1.002    |     |         |         |
|                                  |               | combined         | 25 | -0.092 | 1.281 | 0.256 | -0.621         | 0.437    |     |         |         |
| Communication Reaction-times     | High Workload | Low Performance  | 12 | 0.382  | 0.991 | 0.286 | -0.248         | 1.011    | 22  | 3.234   | .004    |
|                                  |               | High Performance | 12 | -0.636 | 0.452 | 0.131 | -0.923         | -0.348   |     |         |         |
|                                  |               | combined         | 24 | -0.127 | 0.915 | 0.187 | -0.513         | 0.260    |     |         |         |
|                                  | Low Workload  | Low Performance  | 12 | 0.653  | 1.193 | 0.345 | -0.105         | 1.411    | 23  | 2.641   | .015    |
|                                  |               | High Performance | 13 | -0.368 | 0.695 | 0.193 | -0.789         | 0.052    |     |         |         |
|                                  |               | combined         | 25 | 0.122  | 1.080 | 0.216 | -0.324         | 0.568    |     |         |         |
| Resource Management Score        | High Workload | Low Performance  | 12 | 0.193  | 1.106 | 0.319 | -0.509         | 0.896    | 22  | 1.487   | .151    |
|                                  |               | High Performance | 12 | -0.291 | 0.227 | 0.066 | -0.435         | -0.147   |     |         |         |
|                                  |               | combined         | 24 | -0.049 | 0.819 | 0.167 | -0.394         | 0.297    |     |         |         |
|                                  | Low Workload  | Low Performance  | 12 | 0.482  | 1.597 | 0.461 | -0.532         | 1.497    | 23  | 1.893   | .071    |
|                                  |               | High Performance | 13 | -0.355 | 0.057 | 0.016 | -0.390         | -0.321   |     |         |         |
|                                  |               | combined         | 25 | 0.047  | 1.163 | 0.233 | -0.433         | 0.527    |     |         |         |
| System Monitoring Score          | High Workload | Low Performance  | 12 | 0.124  | 0.746 | 0.215 | -0.350         | 0.598    | 22  | -1.837  | .080    |
|                                  |               | High Performance | 12 | 0.647  | 0.646 | 0.186 | 0.237          | 1.058    |     |         |         |
|                                  |               | combined         | 24 | 0.386  | 0.733 | 0.150 | 0.076          | 0.695    |     |         |         |
|                                  | Low Workload  | Low Performance  | 12 | -0.985 | 0.946 | 0.273 | -1.586         | -0.384   | 23  | -3.174  | .004    |
|                                  |               | High Performance | 13 | 0.197  | 0.917 | 0.254 | -0.357         | 0.751    |     |         |         |
|                                  |               | combined         | 25 | -0.370 | 1.092 | 0.218 | -0.821         | 0.081    |     |         |         |
| System Monitoring Reaction-times | High Workload | Low Performance  | 12 | 0.573  | 0.833 | 0.241 | 0.043          | 1.102    | 22  | 3.243   | .004    |
|                                  |               | High Performance | 12 | -0.495 | 0.778 | 0.225 | -0.989         | 0.000    |     |         |         |
|                                  |               | combined         | 24 | 0.039  | 0.959 | 0.196 | -0.366         | 0.444    |     |         |         |
|                                  | Low Workload  | Low Performance  | 12 | 0.311  | 1.049 | 0.303 | -0.356         | 0.977    | 23  | 1.637   | .115    |
|                                  |               | High Performance | 13 | -0.359 | 0.996 | 0.276 | -0.960         | 0.243    |     |         |         |
|                                  |               | combined         | 25 | -0.037 | 1.056 | 0.211 | -0.473         | 0.399    |     |         |         |
| Tracking Score                   | High Workload | Low Performance  | 12 | 0.026  | 0.910 | 0.263 | -0.552         | 0.604    | 22  | 2.124   | .045    |
|                                  |               | High Performance | 12 | -0.605 | 0.480 | 0.139 | -0.910         | -0.300   |     |         |         |
|                                  |               | combined         | 24 | -0.289 | 0.781 | 0.159 | -0.619         | 0.040    |     |         |         |
|                                  | Low Workload  | Low Performance  | 12 | 1.184  | 0.777 | 0.224 | 0.690          | 1.677    | 23  | 6.263   | <.001   |
|                                  |               | High Performance | 13 | -0.558 | 0.610 | 0.169 | -0.927         | -0.190   |     |         |         |
|                                  |               | combined         | 25 | 0.278  | 1.119 | 0.224 | -0.184         | 0.740    |     |         |         |

DoF = Degrees of Freedom

**Table 4.** List of all participants' search-task scores.

| Sequence | RT-1  | PCR-1   | RT-2  | PCR-2   | RT-3  | PCR-3   | RT-4  | PCR-4   | RT-5  | PCR-5   | RT-6  | PCR-6   |
|----------|-------|---------|-------|---------|-------|---------|-------|---------|-------|---------|-------|---------|
| 123      | 0.953 | 91.667  | 0.871 | 94.048  | 0.914 | 92.857  | 0.761 | 92.857  | 0.807 | 91.667  | 0.858 | 94.048  |
| 321      | 0.656 | 94.048  | 0.626 | 96.429  | 0.743 | 94.048  | 0.596 | 98.810  | 0.592 | 95.238  | 0.670 | 97.619  |
| 213      | 0.751 | 94.048  | 0.758 | 92.857  | 0.781 | 92.857  | 0.698 | 100.000 | 0.736 | 95.238  | 0.714 | 98.810  |
| 123      | 0.621 | 95.238  | 0.561 | 92.857  | 0.566 | 94.048  | 0.578 | 92.857  | 0.548 | 88.095  | 0.563 | 96.429  |
| 132      | 0.781 | 100.000 | 0.735 | 97.619  | 0.663 | 95.238  | 0.647 | 97.619  | 0.621 | 95.238  | 0.629 | 97.619  |
| 132      | 0.661 | 98.810  | 0.799 | 94.048  | 0.634 | 96.429  | 0.629 | 96.429  | 0.651 | 96.429  | 0.642 | 94.048  |
| 312      | 0.650 | 98.810  | 0.588 | 94.048  | 0.524 | 96.429  | 0.592 | 91.667  | 0.546 | 94.048  | 0.513 | 90.476  |
| 123      | 0.661 | 98.810  | 0.656 | 100.000 | 0.658 | 98.810  | 0.640 | 98.810  | 0.649 | 97.619  | 0.640 | 100.000 |
| 123      | 0.642 | 98.810  | 0.748 | 96.429  | 0.808 | 98.810  | 0.612 | 98.810  | 0.696 | 97.619  | 0.748 | 98.810  |
| 132      | 0.629 | 98.810  | 0.641 | 91.667  | 0.687 | 91.667  | 0.563 | 91.667  | 0.587 | 92.857  | 0.709 | 94.048  |
| 231      | 0.682 | 97.619  | 0.759 | 95.238  | 0.733 | 92.857  | 0.661 | 92.857  | 0.679 | 91.667  | 0.677 | 95.238  |
| 213      | 0.669 | 95.238  | 0.640 | 96.429  | 0.646 | 95.238  | 0.642 | 100.000 | 0.644 | 96.429  | 0.635 | 100.000 |
| 132      | 0.531 | 96.429  | 0.532 | 94.048  | 0.561 | 98.810  | 0.537 | 98.810  | 0.488 | 96.429  | 0.510 | 97.619  |
| 231      | 0.650 | 96.429  | 0.640 | 98.810  | 0.698 | 98.810  | 0.625 | 97.619  | 0.657 | 98.810  | 0.674 | 100.000 |
| 321      | 0.662 | 100.000 | 0.733 | 98.810  | 1.127 | 94.048  | 0.645 | 100.000 | 0.654 | 100.000 | 0.818 | 100.000 |
| 132      | 0.550 | 98.810  | 0.623 | 98.810  | 0.515 | 100.000 | 0.495 | 97.619  | 0.539 | 98.810  | 0.484 | 96.429  |
| 312      | 0.750 | 89.286  | 0.726 | 91.667  | 0.697 | 95.238  | 0.650 | 98.810  | 0.602 | 98.810  | 0.651 | 98.810  |
| 123      | 0.643 | 100.000 | 0.594 | 100.000 | 0.597 | 98.810  | 0.625 | 98.810  | 0.614 | 98.810  | 0.626 | 98.810  |
| 321      | 0.651 | 98.810  | 0.768 | 98.810  | 0.637 | 97.619  | 0.614 | 98.810  | 0.670 | 95.238  | 0.637 | 98.810  |
| 132      | 0.675 | 86.905  | 0.721 | 82.143  | 0.671 | 82.143  | 0.635 | 88.095  | 0.626 | 82.143  | 0.590 | 86.905  |
| 132      | 0.724 | 100.000 | 0.702 | 100.000 | 0.643 | 100.000 | 0.647 | 98.810  | 0.640 | 95.238  | 0.647 | 96.429  |
| 312      | 0.686 | 98.810  | 0.578 | 97.619  | 0.566 | 98.810  | 0.684 | 97.619  | 0.552 | 98.810  | 0.559 | 98.810  |
| 213      | 0.716 | 98.810  | 0.727 | 97.619  | 0.643 | 97.619  | 0.588 | 96.429  | 0.613 | 96.429  | 0.587 | 96.429  |
| 321      | 0.630 | 100.000 | 0.585 | 98.810  | 0.578 | 98.810  | 0.587 | 98.810  | 0.549 | 100.000 | 0.522 | 97.619  |
| 123      | 1.068 | 85.714  | 0.720 | 92.857  | 0.670 | 89.286  | 0.825 | 92.857  | 0.644 | 94.048  | 0.654 | 92.857  |
| 312      | 0.637 | 96.429  | 0.617 | 100.000 | 0.619 | 97.619  | 0.589 | 98.810  | 0.558 | 95.238  | 0.584 | 97.619  |
| 213      | 0.635 | 84.524  | 0.617 | 92.857  | 0.581 | 94.048  | 0.619 | 92.857  | 0.588 | 92.857  | 0.587 | 92.857  |
| 123      | 0.612 | 89.286  | 0.749 | 88.095  | 0.594 | 90.476  | 0.555 | 88.095  | 0.666 | 88.095  | 0.531 | 89.286  |
| 123      | 0.556 | 100.000 | 0.614 | 97.619  | 0.592 | 98.810  | 0.563 | 100.000 | 0.535 | 98.810  | 0.598 | 98.810  |
| 213      | 0.671 | 95.238  | 0.810 | 90.476  | 0.674 | 92.857  | 0.657 | 96.429  | 0.769 | 90.476  | 0.635 | 89.286  |
| 123      | 0.747 | 95.238  | 0.788 | 95.238  | 0.724 | 97.619  | 0.706 | 100.000 | 0.702 | 97.619  | 0.680 | 98.810  |
| 132      | 0.562 | 90.476  | 0.534 | 92.857  | 0.545 | 96.429  | 0.567 | 90.476  | 0.557 | 94.048  | 0.542 | 94.048  |
| 213      | 0.683 | 92.857  | 0.683 | 95.238  | 0.867 | 94.048  | 0.631 | 96.429  | 0.640 | 96.429  | 0.700 | 92.857  |
| 321      | 0.708 | 97.619  | 0.675 | 97.619  | 0.717 | 97.619  | 0.661 | 91.667  | 0.640 | 91.667  | 0.642 | 95.238  |
| 213      | 0.655 | 98.810  | 0.641 | 98.810  | 0.673 | 97.619  | 0.559 | 96.429  | 0.581 | 98.810  | 0.627 | 97.619  |
| 123      | 0.620 | 86.905  | 0.695 | 84.524  | 0.623 | 85.714  | 0.602 | 89.286  | 0.721 | 83.333  | 0.626 | 92.857  |
| 123      | 0.621 | 94.048  | 0.579 | 97.619  | 0.578 | 92.857  | 0.559 | 92.857  | 0.556 | 94.048  | 0.570 | 96.429  |
| 132      | 0.631 | 95.238  | 0.640 | 96.429  | 0.646 | 97.619  | 0.611 | 96.429  | 0.596 | 97.619  | 0.674 | 98.810  |
| 231      | 0.639 | 98.810  | 0.735 | 96.429  | 0.708 | 97.619  | 0.595 | 97.619  | 0.619 | 96.429  | 0.705 | 96.429  |
| 231      | 0.650 | 96.429  | 0.618 | 98.810  | 0.615 | 98.810  | 0.605 | 97.619  | 0.615 | 97.619  | 0.643 | 97.619  |
| 321      | 0.719 | 89.286  | 0.717 | 91.667  | 1.048 | 83.333  | 0.716 | 86.905  | 0.678 | 92.857  | 0.892 | 88.095  |
| 132      | 0.603 | 95.238  | 0.597 | 90.476  | 0.700 | 90.476  | 0.604 | 95.238  | 0.619 | 94.048  | 0.679 | 94.048  |
| 312      | 0.603 | 94.048  | 0.595 | 96.429  | 0.660 | 96.429  | 0.592 | 95.238  | 0.597 | 96.429  | 0.631 | 98.810  |
| 312      | 0.581 | 98.810  | 0.615 | 97.619  | 0.542 | 97.619  | 0.591 | 94.048  | 0.539 | 98.810  | 0.532 | 96.429  |
| 132      | 0.741 | 83.333  | 0.616 | 89.286  | 0.618 | 90.476  | 0.664 | 88.095  | 0.599 | 91.667  | 0.555 | 89.286  |
| 231      | 0.565 | 95.238  | 0.615 | 97.619  | 0.573 | 94.048  | 0.534 | 95.238  | 0.551 | 95.238  | 0.531 | 94.048  |
| 321      | 0.817 | 86.905  | 0.661 | 92.857  | 0.634 | 95.238  | 0.645 | 94.048  | 0.601 | 91.667  | 0.632 | 95.238  |
| 321      | 0.778 | 100.000 | 0.674 | 97.619  | 0.708 | 98.810  | 0.768 | 100.000 | 0.665 | 98.810  | 0.658 | 100.000 |
| 231      | 0.699 | 98.810  | 0.793 | 100.000 | 0.673 | 97.619  | 0.642 | 100.000 | 0.747 | 98.810  | 0.651 | 98.810  |
| 132      | 0.574 | 96.429  | 0.559 | 98.810  | 0.538 | 94.048  | 0.514 | 95.238  | 0.533 | 98.810  | 0.544 | 95.238  |
| 312      | 1.267 | 95.238  | 0.800 | 98.810  | 0.889 | 100.000 | 1.047 | 95.238  | 0.738 | 100.000 | 0.743 | 100.000 |
| 132      | 0.650 | 96.429  | 0.637 | 92.857  | 0.645 | 95.238  | 0.583 | 95.238  | 0.575 | 95.238  | 0.606 | 96.429  |
| 321      | 0.737 | 96.429  | 0.666 | 100.000 | 0.622 | 97.619  | 0.662 | 95.238  | 0.595 | 96.429  | 0.601 | 97.619  |
| 231      | 0.816 | 97.619  | 0.621 | 100.000 | 0.606 | 98.810  | 0.694 | 95.238  | 0.627 | 97.619  | 0.602 | 100.000 |

Sequence = Order of distractor-absent and -present rounds (same before and after MATB-II)

1 = distractor absent trials; 2 = target dissimilar distractor trials; 3 = target similar distractor trials;

RT = Reaction Times; PCR = Percentage of Correct Responses;

Numbering 1-3 in PCR/RT = Rounds of search-task trials before the MATB-II;

Numbering 4-6 in PCR/RT = Rounds of search-task-trials after the MATB-II;

**Table 5.** Pearson Correlation coefficients between Multi-Attribute Task Battery (MATB-II) sub-task performance scores and bottom-up attention-capture scores divided by groups (all participants, all participants - pilots excluded, low-workload group, high-workload group, pilots only)

| Attention Capture        | MATB-II Subtask                  | Grouping                          | DoF | r      | p    |
|--------------------------|----------------------------------|-----------------------------------|-----|--------|------|
| Bottom-up                | Overall Score                    | All Participants                  | 48  | -0.196 | .177 |
|                          |                                  | All Participants, Pilots excluded | 43  | -0.272 | .075 |
|                          |                                  | Low Workload                      | 24  | -0.287 | .164 |
|                          |                                  | High Workload                     | 23  | -0.134 | .533 |
|                          |                                  | Only Pilots                       | 4   | 0.561  | .323 |
|                          | Communication Score              | All Participants                  | 48  | -0.205 | .157 |
|                          |                                  | All Participants, Pilots excluded | 43  | -0.218 | .154 |
|                          |                                  | Low Workload                      | 24  | -0.273 | .187 |
|                          |                                  | High Workload                     | 23  | -0.023 | .915 |
|                          |                                  | Only Pilots                       | 4   | -      | -    |
|                          | Communication Reaction-times     | All Participants                  | 48  | 0.084  | .565 |
|                          |                                  | All Participants, Pilots excluded | 43  | 0.078  | .617 |
|                          |                                  | Low Workload                      | 24  | 0.261  | .208 |
|                          |                                  | High Workload                     | 23  | -0.228 | .283 |
|                          |                                  | Only Pilots                       | 4   | 0.315  | .605 |
|                          | Resource Management              | All Participants                  | 48  | 0.012  | .933 |
|                          |                                  | All Participants, Pilots excluded | 43  | 0.205  | .183 |
|                          |                                  | Low Workload                      | 24  | -0.056 | .791 |
|                          |                                  | High Workload                     | 23  | 0.206  | .335 |
|                          |                                  | Only Pilots                       | 4   | -0.771 | .127 |
|                          | System Monitoring Score          | All Participants                  | 48  | 0.027  | .854 |
|                          |                                  | All Participants, Pilots excluded | 43  | 0.004  | .980 |
|                          |                                  | Low Workload                      | 24  | 0.062  | .768 |
|                          |                                  | High Workload                     | 23  | -0.242 | .254 |
|                          |                                  | Only Pilots                       | 4   | 0.402  | .502 |
|                          | System Monitoring Reaction-times | All Participants                  | 48  | 0.160  | .272 |
|                          |                                  | All Participants, Pilots excluded | 43  | 0.135  | .382 |
|                          |                                  | Low Workload                      | 24  | 0.222  | .287 |
|                          |                                  | High Workload                     | 23  | 0.039  | .856 |
|                          |                                  | Only Pilots                       | 4   | 0.674  | .212 |
|                          | Tracking Task                    | All Participants                  | 48  | 0.260  | .172 |
|                          |                                  | All Participants, Pilots excluded | 43  | 0.367  | .114 |
|                          |                                  | Low Workload                      | 24  | 0.322  | .116 |
|                          |                                  | High Workload                     | 23  | 0.282  | .181 |
|                          |                                  | Only Pilots                       | 4   | -0.710 | .179 |
| DoF = Degrees of Freedom |                                  |                                   |     |        |      |

**Table 6.** Pearson Correlation coefficients between Multi-Attribute Task Battery (MATB-II) sub-task performances and top-down attention-capture scores divided by groups (all participants, all participants - pilots excluded, low-workload group, high-workload group, pilots only)

| Attention Capture<br>Top-Down | MATB-II Subtask                  | Grouping                          | DoF | r      | p    |
|-------------------------------|----------------------------------|-----------------------------------|-----|--------|------|
|                               | Overall Score                    | All Participants                  | 48  | 0.152  | .297 |
|                               |                                  | All Participants, Pilots excluded | 43  | 0.172  | .264 |
|                               |                                  | Low Workload                      | 24  | 0.177  | .398 |
|                               |                                  | High Workload                     | 23  | 0.109  | .611 |
|                               |                                  | Only Pilots                       | 4   | -0.220 | .722 |
|                               | Communication Score              | All Participants                  | 48  | 0.230  | .113 |
|                               |                                  | All Participants, Pilots excluded | 43  | 0.215  | .161 |
|                               |                                  | Low Workload                      | 24  | 0.380  | .091 |
|                               |                                  | High Workload                     | 23  | -0.032 | .883 |
|                               |                                  | Only Pilots                       | 4   | -      | -    |
|                               | Communication Reaction-times     | All Participants                  | 48  | -0.040 | .785 |
|                               |                                  | All Participants, Pilots excluded | 43  | 0.023  | .884 |
|                               |                                  | Low Workload                      | 24  | -0.186 | .372 |
|                               |                                  | High Workload                     | 23  | 0.136  | .526 |
|                               |                                  | Only Pilots                       | 4   | -0.757 | .139 |
|                               | Resource Management              | All Participants                  | 48  | 0.040  | .786 |
|                               |                                  | All Participants, Pilots excluded | 43  | -0.083 | .592 |
|                               |                                  | Low Workload                      | 24  | 0.209  | .316 |
|                               |                                  | High Workload                     | 23  | -0.180 | .399 |
|                               |                                  | Only Pilots                       | 4   | 0.350  | .564 |
|                               | System Monitoring Score          | All Participants                  | 48  | -0.053 | .718 |
|                               |                                  | All Participants, Pilots excluded | 43  | -0.073 | .637 |
|                               |                                  | Low Workload                      | 24  | -0.122 | .562 |
|                               |                                  | High Workload                     | 23  | -0.021 | .922 |
|                               |                                  | Only Pilots                       | 4   | -0.123 | .844 |
|                               | System Monitoring Reaction-times | All Participants                  | 48  | -0.138 | .343 |
|                               |                                  | All Participants, Pilots excluded | 43  | -0.135 | .382 |
|                               |                                  | Low Workload                      | 24  | -0.126 | .547 |
|                               |                                  | High Workload                     | 23  | -0.157 | .465 |
|                               |                                  | Only Pilots                       | 4   | 0.092  | .883 |
|                               | Tracking Task                    | All Participants                  | 48  | -0.223 | .124 |
|                               |                                  | All Participants, Pilots excluded | 43  | -0.282 | .084 |
|                               |                                  | Low Workload                      | 24  | -0.203 | .331 |
|                               |                                  | High Workload                     | 23  | -0.251 | .237 |
|                               |                                  | Only Pilots                       | 4   | 0.311  | .610 |

DoF = Degrees of Freedom

**Table 7.** X-Y coordinate tracking. Percentages of which area eyes were directed at.

| Condition     | System Monitoring | Tracking | Communication | Resource Management | Other  |
|---------------|-------------------|----------|---------------|---------------------|--------|
| High-Workload | 7.556             | 44.196   | 22.952        | 22.186              | 3.110  |
| Low-Workload  | 17.264            | 45.041   | 11.459        | 24.262              | 1.973  |
| High-Workload | 0.363             | 27.603   | 0.242         | 44.431              | 27.361 |
| Low-Workload  | 10.373            | 37.207   | 10.331        | 34.655              | 7.433  |
| Low-Workload  | 9.966             | 45.309   | 26.252        | 15.216              | 3.257  |
| Low-Workload  | 8.629             | 37.985   | 8.126         | 33.806              | 11.454 |
| High-Workload | 19.744            | 53.734   | 3.641         | 18.161              | 4.720  |
| Low-Workload  | 21.433            | 24.451   | 23.440        | 27.126              | 3.549  |
| Low-Workload  | 18.173            | 32.829   | 14.118        | 32.193              | 2.687  |
| Low-Workload  | 15.472            | 37.694   | 9.857         | 28.704              | 8.274  |
| High-Workload | 18.175            | 36.508   | 19.045        | 20.338              | 5.935  |
| High-Workload | 16.083            | 43.081   | 14.129        | 22.106              | 4.602  |
| High-Workload | 13.820            | 42.086   | 16.254        | 27.068              | 0.771  |
| Low-Workload  | 27.159            | 30.682   | 10.682        | 17.727              | 13.750 |
| High-Workload | 17.091            | 31.052   | 20.416        | 29.519              | 1.922  |
| High-Workload | 10.410            | 48.731   | 13.565        | 18.412              | 8.881  |
| High-Workload | 9.545             | 38.256   | 10.406        | 40.071              | 1.722  |
| High-Workload | 17.792            | 35.705   | 18.087        | 26.058              | 2.358  |
| Low-Workload  | 13.301            | 36.490   | 17.761        | 28.132              | 4.316  |
| High-Workload | 15.278            | 39.417   | 15.875        | 25.389              | 4.042  |
| Low-Workload  | 11.328            | 47.877   | 4.816         | 34.569              | 1.410  |
| High-Workload | 18.068            | 33.764   | 12.906        | 33.986              | 1.277  |
| Low-Workload  | 21.716            | 46.872   | 9.897         | 20.599              | 0.916  |
| Low-Workload  | 28.639            | 36.935   | 9.448         | 24.465              | 0.512  |
| Low-Workload  | 20.859            | 34.566   | 11.367        | 28.230              | 4.979  |
| Low-Workload  | 12.844            | 32.200   | 18.777        | 32.344              | 3.835  |
| Low-Workload  | 5.694             | 38.180   | 13.676        | 30.147              | 12.303 |
| Low-Workload  | 16.726            | 34.584   | 9.947         | 36.110              | 2.633  |
| High-Workload | 22.373            | 42.409   | 9.787         | 23.452              | 1.978  |
| Low-Workload  | 20.607            | 45.617   | 9.150         | 21.992              | 2.634  |
| Low-Workload  | 9.170             | 61.878   | 7.249         | 20.044              | 1.659  |
| Low-Workload  | 22.251            | 36.909   | 11.313        | 25.401              | 4.126  |
| High-Workload | 14.143            | 32.848   | 21.700        | 24.480              | 6.829  |
| Low-Workload  | 18.082            | 53.642   | 6.761         | 19.678              | 1.838  |
| Low-Workload  | 11.714            | 38.142   | 19.100        | 23.745              | 7.299  |
| Low-Workload  | 12.887            | 47.062   | 11.603        | 25.719              | 2.729  |
| Low-Workload  | 24.694            | 39.807   | 7.234         | 26.744              | 1.522  |
| High-Workload | 13.945            | 48.068   | 17.161        | 18.252              | 2.574  |
| High-Workload | 70.063            | 5.987    | 9.802         | 13.085              | 1.062  |
| High-Workload | 16.417            | 32.334   | 19.552        | 31.146              | 0.551  |
| High-Workload | 16.267            | 21.775   | 22.642        | 38.654              | 0.663  |
| High-Workload | 26.127            | 34.661   | 6.326         | 31.856              | 1.030  |
| Low-Workload  | 5.889             | 47.173   | 11.671        | 31.760              | 3.508  |
| Low-Workload  | 9.069             | 27.660   | 21.057        | 34.236              | 7.978  |
| High-Workload | 16.817            | 38.720   | 17.637        | 24.000              | 2.825  |
| High-Workload | 5.304             | 44.349   | 10.608        | 23.932              | 15.807 |
| High-Workload | 17.660            | 39.514   | 15.749        | 22.602              | 4.475  |
| High-Workload | 17.045            | 27.765   | 15.985        | 35.739              | 3.466  |
| Low-Workload  | 13.127            | 36.776   | 8.304         | 34.189              | 7.604  |
| Low-Workload  | 12.757            | 45.339   | 10.955        | 30.034              | 0.915  |
| High-Workload | 12.604            | 28.024   | 27.385        | 26.238              | 5.748  |
| Low-Workload  | 11.331            | 66.667   | 9.537         | 11.000              | 1.464  |
| High-Workload | 21.284            | 42.234   | 11.474        | 21.647              | 3.361  |
| High-Workload | 22.376            | 33.684   | 5.562         | 31.920              | 6.458  |

Other = Time spent outside Areas of Interest

**Table 8.** T-Test of all NASA Task Load Index (TLX) scores, between participants in the low-workload group and the high-workload group, as well as between participants in the low-performance group and participants in the high-performance group.

| NASA Task Load Index (TLX) | Group       | Variable                    | N         | Mean          | SD            | SE           | 95%_Confidence | Interval      | DoF | T-Value | p-Value |
|----------------------------|-------------|-----------------------------|-----------|---------------|---------------|--------------|----------------|---------------|-----|---------|---------|
| "Mental"                   | Workload    | Low Workload                | 25        | 65.840        | 18.286        | 3.657        | 58.292         | 73.388        | 47  | -0.714  | .479    |
|                            |             | High Workload               | 24        | 69.250        | 14.871        | 3.036        | 62.970         | 75.530        |     |         |         |
|                            |             | Combined Workload           | 49        | 67.510        | 16.617        | 2.374        | 62.737         | 72.283        |     |         |         |
|                            | Performance | Low Performance             | 24        | 70.667        | 15.887        | 3.243        | 63.958         | 77.375        | 47  | 1.313   | .196    |
|                            |             | High Performance            | 25        | 64.480        | 17.054        | 3.411        | 57.440         | 71.520        |     |         |         |
|                            |             | Combined Performance        | 49        | 67.510        | 16.617        | 2.374        | 62.737         | 72.283        |     |         |         |
| "Physical"                 | Workload    | Low Workload                | 25        | 23.960        | 21.161        | 4.232        | 15.225         | 32.695        | 47  | -0.946  | .349    |
|                            |             | High Workload               | 24        | 29.333        | 18.436        | 3.763        | 21.549         | 37.118        |     |         |         |
|                            |             | Combined Workload           | 49        | 26.592        | 19.852        | 2.836        | 20.890         | 32.294        |     |         |         |
|                            | Performance | Low Performance             | 24        | 22.542        | 21.135        | 4.314        | 13.617         | 31.466        | 47  | -1.414  | .164    |
|                            |             | High Performance            | 25        | 30.480        | 18.111        | 3.622        | 23.004         | 37.956        |     |         |         |
|                            |             | Combined Performance        | 49        | 26.592        | 19.852        | 2.836        | 20.890         | 32.294        |     |         |         |
| "Temporal"                 | Workload    | Low Workload                | 25        | 56.920        | 21.504        | 4.301        | 48.044         | 65.796        | 47  | -0.531  | .598    |
|                            |             | High Workload               | 24        | 59.958        | 18.346        | 3.745        | 52.212         | 67.705        |     |         |         |
|                            |             | Combined Workload           | 49        | 58.408        | 19.870        | 2.839        | 52.701         | 64.116        |     |         |         |
|                            | Performance | Low Performance             | 24        | 60.917        | 21.962        | 4.483        | 51.643         | 70.191        | 47  | 0.864   | .392    |
|                            |             | High Performance            | 25        | 56.000        | 17.751        | 3.550        | 48.673         | 63.327        |     |         |         |
|                            |             | Combined Performance        | 49        | 58.408        | 19.870        | 2.839        | 52.701         | 64.116        |     |         |         |
| "Performance"              | Workload    | Low Workload                | 25        | 43.080        | 20.486        | 4.097        | 34.624         | 51.536        | 47  | 0.153   | .879    |
|                            |             | High Workload               | 24        | 42.167        | 21.315        | 4.351        | 33.166         | 51.167        |     |         |         |
|                            |             | Combined Workload           | 49        | 42.633        | 20.682        | 2.955        | 36.692         | 48.573        |     |         |         |
|                            | Performance | Low Performance             | 24        | 50.083        | 21.571        | 4.403        | 40.975         | 59.192        | 47  | 2.617   | .012    |
|                            |             | High Performance            | 25        | 35.480        | 17.342        | 3.468        | 28.321         | 42.639        |     |         |         |
|                            |             | <b>Combined Performance</b> | <b>49</b> | <b>42.633</b> | <b>20.682</b> | <b>2.955</b> | <b>36.692</b>  | <b>48.573</b> |     |         |         |
| "Effort"                   | Workload    | Low Workload                | 25        | 67.240        | 18.873        | 3.775        | 59.450         | 75.030        | 47  | -1.534  | .132    |
|                            |             | High Workload               | 24        | 74.667        | 14.646        | 2.990        | 68.482         | 80.851        |     |         |         |
|                            |             | Combined Workload           | 49        | 70.878        | 17.174        | 2.453        | 65.945         | 75.810        |     |         |         |
|                            | Performance | Low Performance             | 24        | 75.708        | 14.565        | 2.973        | 69.558         | 81.858        | 47  | 1.988   | .053    |
|                            |             | High Performance            | 25        | 66.240        | 18.462        | 3.692        | 58.619         | 73.861        |     |         |         |
|                            |             | Combined Performance        | 49        | 70.878        | 17.174        | 2.453        | 65.945         | 75.810        |     |         |         |
| "Frustration"              | Workload    | Low Workload                | 25        | 38.560        | 23.875        | 4.775        | 28.705         | 48.415        | 47  | 1.453   | .153    |
|                            |             | High Workload               | 24        | 29.667        | 18.504        | 3.777        | 21.853         | 37.480        |     |         |         |
|                            |             | Combined Workload           | 49        | 34.204        | 21.662        | 3.095        | 27.982         | 40.426        |     |         |         |
|                            | Performance | Low Performance             | 24        | 40.292        | 24.996        | 5.102        | 29.737         | 50.847        | 47  | 1.986   | .053    |
|                            |             | High Performance            | 25        | 28.360        | 16.342        | 3.268        | 21.614         | 35.106        |     |         |         |
|                            |             | Combined Performance        | 49        | 34.204        | 21.662        | 3.095        | 27.982         | 40.426        |     |         |         |

„Mental“ = „Wie mental/geistig anstrengend waren die Aufgaben?“ („How mentally demanding was the task?“);

„Physical“ = „Wie physisch/körperlich anstrengend waren die Aufgaben?“ („How physically demanding was the task?“);

„Temporal“ = „Wie stressing waren die Aufgaben?“ („How hurried or rushed was the pace of the task?“);

„Performance“ = „Wie gut schätzt du deine Leistungen in den Aufgaben ein?“ („How successful were you in accomplishing what you were asked to do?“);

„Effort“ = „Wie sehr musstest du dich anstrengen, um diese Leistung zu erbringen?“ („How hard did you have to work to accomplish your level of performance?“);

„Frustration“ = „Wie unsicher, entmutigt, irritiert, gestresst oder genervt hast du dich während der Aufgaben gefühlt?“ („How insecure, discouraged, irritated, stressed, or annoyed were you during the task?“)
